# Supplementary material for: IRG1 and Inducible Nitric Oxide Synthase Act Redundantly with Other Interferon-Gamma-Induced Factors To Restrict Intracellular Replication of Legionella pneumophila
Source: PubMed Central journal article supplement (PMC6851286; doi:10.1128/mbio.02629-19), 2019-11-12

FIG S2

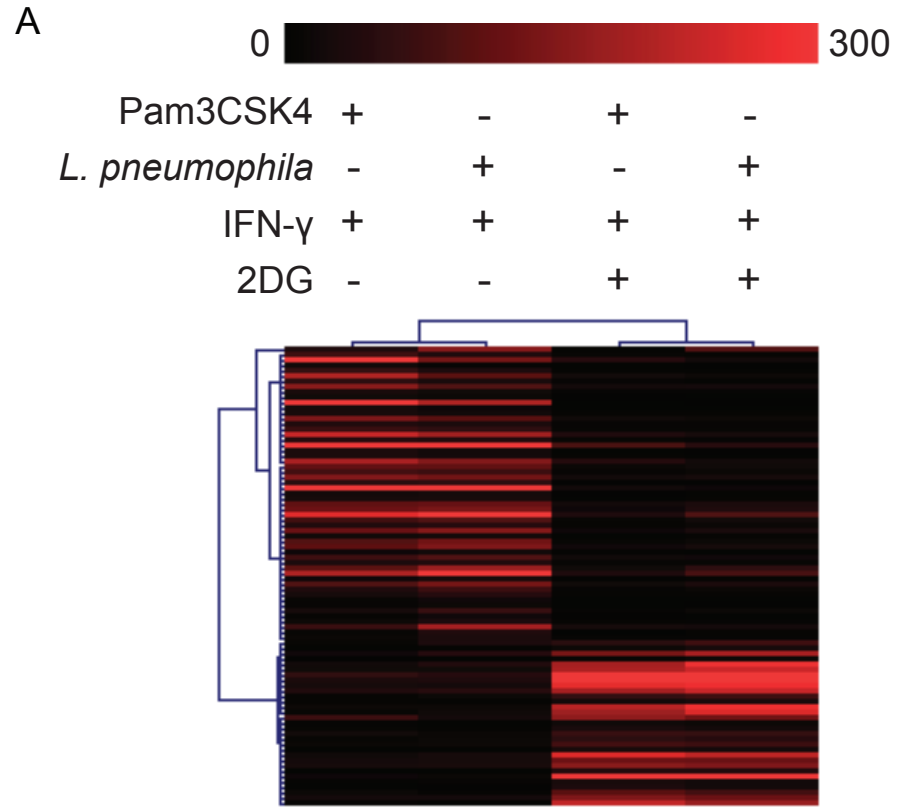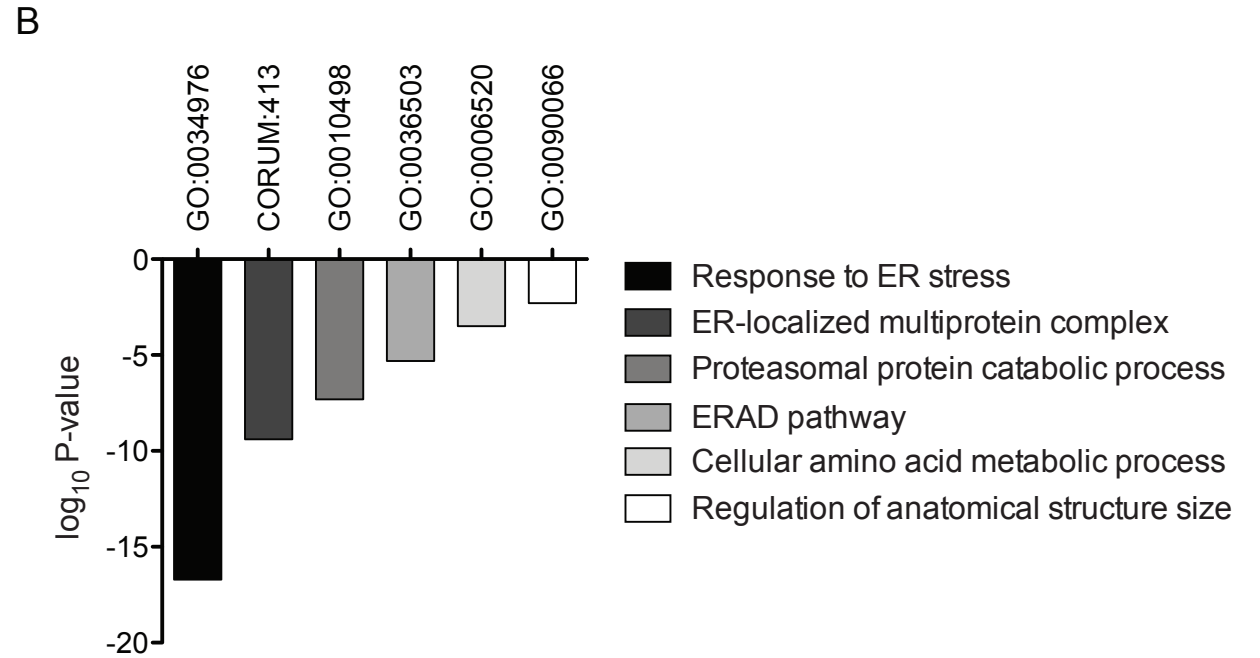

Supplement: mBio.02629-19-sf002.pdf [file mBio.02629-19-sf002.pdf]
