# Supplementary material for: IRG1 and Inducible Nitric Oxide Synthase Act Redundantly with Other Interferon-Gamma-Induced Factors To Restrict Intracellular Replication of Legionella pneumophila
Source: PubMed Central journal article supplement (PMC6851286; doi:10.1128/mbio.02629-19), 2019-11-12
Supplement: mBio.02629-19-st001.pdf [file mBio.02629-19-st001.pdf]

Table S1. Transcripts that vary significantly in BMMs exposed to Pam3CSK4 or *L. pneumophila* treated with IFN- $\gamma$  vs. IFN- $\gamma$  + 2DG.

| Location                  | PAM + IFN- $\gamma$ FPKM | L.p. + IFN- $\gamma$ FPKM | PAM + IFN- $\gamma$ + 2DG FPKM | L.p. + IFN- $\gamma$ + 2DG FPKM | log <sub>2</sub> fold change PAM<br>#DIV/0! | log <sub>2</sub> fold change L.p. | Gene                  |
|---------------------------|--------------------------|---------------------------|--------------------------------|---------------------------------|---------------------------------------------|-----------------------------------|-----------------------|
| chr3:121723536-121735052  | 8.64                     | 40.80                     | 0.00                           | 0.00                            | 5.34                                        | 2.93                              | F3                    |
| chr10:24914852-24927760   | 330.60                   | 207.90                    | 2.82                           | 2.82                            | 1.73                                        | 6.87                              | Arg1                  |
| chr10:99263230-99267489   | 51.60                    | 57.56                     | 1.67                           | 1.67                            | 2.19                                        | 4.95                              | Dusp6                 |
| chr11:9117979-9136170     | 378.41                   | 400.15                    | 22.16                          | 22.16                           | 16.15                                       | 4.09                              | Upp1                  |
| chr8:65618039-66473349    | 65.13                    | 33.38                     | 4.18                           | 4.18                            | 4.00                                        | 3.96                              | March1                |
| chr12:119158487-119238276 | 19.50                    | 12.96                     | 1.64                           | 1.64                            | 2.44                                        | 3.57                              | Itgb8                 |
| chr13:60895350-60897447   | 98.59                    | 132.14                    | 9.22                           | 9.22                            | 13.67                                       | 3.42                              | Ctla2b                |
| chr2:128698860-128803160  | 22.88                    | 25.86                     | 2.16                           | 2.16                            | 3.90                                        | 3.40                              | Mertk                 |
| chr13:117220572-117274415 | 81.92                    | 73.16                     | 7.79                           | 7.79                            | 12.61                                       | 3.39                              | Emb                   |
| chr5:43868826-43912389    | 208.64                   | 107.66                    | 20.31                          | 20.31                           | 14.14                                       | 3.36                              | Cd38                  |
| chr14:60634728-60764556   | 26.37                    | 27.59                     | 2.65                           | 2.65                            | 5.08                                        | 3.32                              | Spata13               |
| chr9:124102182-124109140  | 15.99                    | 25.65                     | 1.63                           | 1.63                            | 4.28                                        | 3.29                              | Ccr2                  |
| chr16:10782304-10785536   | 115.02                   | 113.26                    | 12.45                          | 12.45                           | 18.68                                       | 3.21                              | Socs1                 |
| chr7:43526933-43533175    | 30.95                    | 22.50                     | 3.38                           | 3.38                            | 1.66                                        | 3.20                              | Cd33                  |
| chr12:32173396-32208649   | 25.18                    | 16.27                     | 3.00                           | 3.00                            | 2.38                                        | 3.07                              | Pik3cg                |
| chr4:132732965-132757171  | 147.14                   | 106.91                    | 17.72                          | 17.72                           | 14.48                                       | 3.05                              | Smpd13b               |
| chr5:123863569-123865516  | 79.28                    | 95.76                     | 9.69                           | 9.69                            | 20.41                                       | 3.03                              | Niacr1                |
| chr10:56377299-56390419   | 76.79                    | 35.79                     | 9.43                           | 9.43                            | 5.28                                        | 3.03                              | Gja1                  |
| chr13:43785106-43803132   | 37.04                    | 157.83                    | 4.70                           | 4.70                            | 98.43                                       | 2.98                              | Cd83                  |
| chr6:29272487-29276390    | 127.10                   | 143.20                    | 16.23                          | 16.23                           | 38.78                                       | 2.97                              | Hilpda                |
| chr19:40659646-40742515   | 39.22                    | 47.47                     | 5.09                           | 5.09                            | 11.21                                       | 2.94                              | Entpd1                |
| chr10:10335702-10472314   | 55.22                    | 30.34                     | 7.18                           | 7.18                            | 4.46                                        | 2.94                              | Adgb                  |
| chr11:62248983-62266580   | 123.70                   | 155.86                    | 16.22                          | 16.22                           | 29.61                                       | 2.93                              | Adora2b               |
| chr5:43818892-43843468    | 71.44                    | 57.94                     | 9.40                           | 9.40                            | 9.24                                        | 2.93                              | Bst1                  |
| chr9:7272513-7283333      | 352.87                   | 137.78                    | 47.51                          | 47.51                           | 22.29                                       | 2.89                              | Mmp13                 |
| chr11:117965741-117969830 | 262.49                   | 306.84                    | 35.50                          | 35.50                           | 94.93                                       | 2.89                              | Socs3                 |
| chr6:123227866-123247024  | 151.03                   | 133.87                    | 21.24                          | 21.24                           | 26.78                                       | 2.83                              | Clec4n                |
| chr7:3485746-3502752      | 159.87                   | 96.29                     | 23.43                          | 23.43                           | 23.92                                       | 2.77                              | Tarm1                 |
| chr13:97241104-97253040   | 17.85                    | 23.35                     | 2.74                           | 2.74                            | 5.14                                        | 2.71                              | Enc1                  |
| chr11:83116844-83122659   | 109.82                   | 148.71                    | 17.36                          | 17.36                           | 26.50                                       | 2.66                              | Sfn1                  |
| chr17:17887823-17893952   | 569.21                   | 405.70                    | 90.54                          | 90.54                           | 49.52                                       | 2.65                              | Fpr2                  |
| chr17:17875768-17883951   | 233.86                   | 190.30                    | 38.79                          | 38.79                           | 25.60                                       | 2.59                              | Fpr1                  |
| chr12:31958478-32061279   | 31.62                    | 24.11                     | 5.41                           | 5.41                            | 3.49                                        | 2.55                              | Prkar2b               |
| chr12:85473900-85477478   | 109.40                   | 181.78                    | 19.23                          | 19.23                           | 57.55                                       | 2.51                              | Fos                   |
| chr2:117279992-117342877  | 28.14                    | 21.39                     | 5.01                           | 5.01                            | 5.37                                        | 2.49                              | Rasgrp1               |
| chr18:60393061-60443899   | 38.13                    | 72.99                     | 6.80                           | 6.80                            | 12.16                                       | 2.49                              | EMBL-EBI AK149718.1   |
| chr15:74979722-75048837   | 203.51                   | 318.72                    | 37.53                          | 37.53                           | 87.21                                       | 2.44                              | Ly6a                  |
| chr9:118606708-118901003  | 18.55                    | 6.20                      | 3.48                           | 3.48                            | 2.30                                        | 2.42                              | Itga9                 |
| chr2:164948238-164955846  | 40.93                    | 31.23                     | 7.80                           | 7.80                            | 7.27                                        | 2.39                              | Mmp9                  |
| chr16:75858793-75909273   | 96.32                    | 139.27                    | 18.98                          | 18.98                           | 32.44                                       | 2.34                              | Samsn1                |
| chr7:38183216-38197565    | 26.84                    | 48.18                     | 5.34                           | 5.34                            | 5.68                                        | 2.33                              | RIKEN cDNA 1600014C10 |
| chr4:132781761-132796364  | 112.02                   | 119.12                    | 22.44                          | 22.44                           | 31.54                                       | 2.32                              | Themis2               |
| chr19:21778341-21858450   | 48.39                    | 42.18                     | 9.98                           | 9.98                            | 6.90                                        | 2.28                              | Cemp2                 |
| chr9:41012959-41157668    | 29.20                    | 18.98                     | 6.47                           | 6.47                            | 6.32                                        | 2.17                              | Ubash3b               |
| chr5:137787801-137858049  | 197.74                   | 153.77                    | 44.00                          | 44.00                           | 22.16                                       | 2.17                              | Zcwpw1                |
| chr12:80107759-80113013   | 16.27                    | 22.12                     | 3.87                           | 3.87                            | 2.84                                        | 2.07                              | Zfp361i               |
| chr8:92855349-92919279    | 75.81                    | 97.27                     | 18.55                          | 18.55                           | 17.46                                       | 2.03                              | Lpcat2                |
| chr11:48985328-48992246   | 26.32                    | 69.92                     | 6.72                           | 6.72                            | 13.40                                       | 1.97                              | Tgtp1                 |
| chr11:44454570-44470548   | 34.39                    | 40.38                     | 9.35                           | 9.35                            | 8.33                                        | 1.88                              | Ublcp1                |
| chr7:144415253-144538029  | 9.19                     | 16.69                     | 2.59                           | 2.59                            | 2.62                                        | 1.83                              | Pde3b                 |
| chr3:27317076-27339665    | 5.40                     | 16.81                     | 1.74                           | 1.74                            | 2.59                                        | 1.64                              | Tnfrsf10              |
| chr17:44096293-44105808   | 8.18                     | 14.92                     | 2.71                           | 2.71                            | 2.14                                        | 1.60                              | Enpp4                 |
| chr8:45395664-45410539    | 15.12                    | 33.76                     | 5.17                           | 5.17                            | 6.57                                        | 1.55                              | Tlr3                  |
| chr11:83175185-83190251   | 71.33                    | 191.83                    | 26.41                          | 26.41                           | 24.21                                       | 1.43                              | Sfn4                  |
| chr19:21391306-21472661   | 11.06                    | 32.62                     | 6.57                           | 6.57                            | 6.32                                        | 0.75                              | Gda                   |
| chr6:7675170-7693182      | 73.21                    | 24.00                     | 165.25                         | 165.25                          | 132.37                                      | -1.17                             | Asns                  |
| chr4:59805649-59904832    | 5.90                     | 2.86                      | 17.84                          | 17.84                           | 14.42                                       | -1.60                             | Snx30                 |
| chrX:36328408-36366856    | 9.53                     | 4.48                      | 30.18                          | 30.18                           | 22.38                                       | -1.66                             | Lonrf3                |
| chr3:108424774-108445259  | 20.26                    | 12.28                     | 70.09                          | 70.09                           | 65.73                                       | -1.79                             | Sars                  |
| chr3:100468062-100489192  | 3.45                     | 3.65                      | 14.71                          | 14.71                           | 26.76                                       | -2.09                             | Fam46c                |
| chr10:127514938-127522444 | 5.23                     | 4.16                      | 22.87                          | 22.87                           | 29.79                                       | -2.13                             | Shmt2                 |
| chr16:22857844-22879634   | 39.83                    | 50.36                     | 195.50                         | 195.50                          | 234.30                                      | -2.30                             | Dnajb11               |
| chr12:116405401-116463531 | 1.97                     | 2.87                      | 9.82                           | 9.82                            | 14.79                                       | -2.32                             | Ncapg2                |
| chr7:132557474-132576398  | 24.59                    | 26.95                     | 127.96                         | 127.96                          | 123.99                                      | -2.38                             | Oat                   |
| chr11:114922780-114934386 | 9.25                     | 13.23                     | 53.38                          | 53.38                           | 47.90                                       | -2.53                             | -1.86 Cd300lb         |
| chr2:121413901-121438686  | 24.63                    | 23.63                     | 149.03                         | 149.03                          | 124.87                                      | -2.60                             | Pdia3                 |
| chr12:91805907-91849157   | 26.09                    | 27.07                     | 159.39                         | 159.39                          | 150.35                                      | -2.61                             | Sel1l                 |
| chr7:45522738-45526268    | 8.36                     | 35.02                     | 51.65                          | 51.65                           | 77.48                                       | -2.63                             | -1.15 Ppp1r15a        |
| chr14:118937931-118981702 | 12.60                    | 14.45                     | 82.25                          | 82.25                           | 73.67                                       | -2.71                             | Dnajc3                |
| chr13:95627176-95891922   | 3.81                     | 7.23                      | 27.27                          | 27.27                           | 22.09                                       | -2.84                             | Iggap2                |
| chr2:152337424-152344060  | 13.31                    | 5.55                      | 106.51                         | 106.51                          | 83.01                                       | -3.00                             | Trib3                 |
| chr18:65800577-65817657   | 16.65                    | 48.02                     | 140.92                         | 140.92                          | 196.46                                      | -3.08                             | -2.03 Sec11c          |
| chr13:110395043-110400843 | 21.74                    | 43.21                     | 195.08                         | 195.08                          | 288.27                                      | -3.17                             | Plk2                  |
| chr12:17266594-17324730   | 61.82                    | 47.19                     | 606.19                         | 606.19                          | 664.54                                      | -3.29                             | -3.82 Pdia6           |
| chr14:103814624-103844524 | 2.83                     | 2.98                      | 27.82                          | 27.82                           | 24.59                                       | -3.30                             | -3.04 Ednrb           |
| chr9:106887414-106891938  | 19.43                    | 19.31                     | 201.31                         | 201.31                          | 236.22                                      | -3.37                             | -3.61 Manf            |
| chr6:47796140-47813512    | 31.57                    | 35.74                     | 330.67                         | 330.67                          | 344.11                                      | -3.39                             | -3.27 Pdia4           |
| chr9:44379489-44392576    | 24.95                    | 23.65                     | 269.93                         | 269.93                          | 281.33                                      | -3.44                             | -3.57 Hyou1           |
| chr16:92391952-92466146   | 5.64                     | 13.03                     | 63.96                          | 63.96                           | 77.68                                       | -3.50                             | -2.58 Rcan1           |
| chr2:84936608-84958509    | 3.33                     | 2.78                      | 41.74                          | 41.74                           | 39.64                                       | -3.65                             | -3.84 Slc43a3         |
| chr12:83987860-83993875   | 2.60                     | 1.65                      | 33.74                          | 33.74                           | 23.37                                       | -3.70                             | -3.83 Acot2           |
| chr12:44205896-44210068   | 17.95                    | 25.83                     | 259.96                         | 259.96                          | 223.40                                      | -3.86                             | -3.11 Dnajb9          |
| chr10:127290792-127311786 | 14.13                    | 14.59                     | 217.63                         | 217.63                          | 284.18                                      | -3.94                             | -4.28 Ddit3           |
| chr15:88819645-88826718   | 10.05                    | 18.32                     | 184.55                         | 184.55                          | 257.10                                      | -4.20                             | -3.81 Creld2          |
| chr16:17130137-17132383   | 15.35                    | 11.96                     | 331.95                         | 331.95                          | 311.42                                      | -4.43                             | -4.70 Sdf211          |
| chr8:94386499-94395358    | 6.33                     | 3.36                      | 225.67                         | 225.67                          | 175.88                                      | -5.16                             | -5.71 Herpud1         |
